# Supplementary material for: Contribution of gut microbiomes and their metabolomes to the performance of Dorper and Tan sheep
Source: Front Microbiol. 2022 Nov 28;13:1047744. doi: 10.3389/fmicb.2022.1047744 (PMC9742522; doi:10.3389/fmicb.2022.1047744)
Supplement: Supplementary file 4 [file Table_4.xls]

## Sheet: Rumen
name	Ratio(DR/TR )	Pvalue(DR/TR )	VIP(DR/TR )	Formula	Molecular Weight
DL-Arginine	2.01496	0.00186045	2.15279	C6 H14 N4 O2	174.111
Uracil	0.79147	0.0346468	1.64918	C4 H4 N2 O2	112.027
Fumaric acid	0.704058	0.0183509	1.9635	C4 H4 O4	116.011
Putrescine	2.10013	0.00745376	1.94474	C4 H12 N2	88.0999
L-Histidine	1.51648	0.0363165	1.56462	C6 H9 N3 O2	155.069
N-Acetyl-D-glucosamine	0.844213	0.0262892	1.9599	C8 H15 N O6	221.09
DMPC	0.540313	0.00120754	2.2612	C36 H72 N O8 P	677.497
Guanine	1.68231	0.0435883	1.7864	C5 H5 N5 O	151.049
Nicotinic acid	1.45189	0.000292006	2.35281	C6 H5 N O2	123.032
L-Homoserine	1.4164	0.025242	1.69633	C4 H9 N O3	119.058
O-Phosphorylethanolamine	0.877717	0.0102486	1.91475	C2 H8 N O4 P	140.951
1-palmitoyl-2-oleoyl-sn-glycero-3-phosphoethanolamine	0.564932	0.00264554	2.09498	C39 H76 N O8 P	717.528
Tryptamine	0.530017	0.0292513	1.7634	C10 H12 N2	160.1
D-(-)-Lyxose	0.669309	0.0411857	1.90662	C5 H10 O5	150.052
2'-Deoxyadenosine	0.611106	0.0364877	1.64918	C10 H13 N5 O3	251.101
N1-Acetylspermidine	2.62846	0.0084266	1.87171	C9 H21 N3 O	187.168
D-(+)-Proline	0.615024	0.0125924	1.91433	C5 H9 N O2	115.063
Pantothenic acid	1.6441	0.0188386	1.94578	C9 H17 N O5	219.11
2-Aminoadipic acid	1.63522	0.00751022	1.95789	C6 H11 N O4	161.068
9S,13R-12-Oxophytodienoic acid	0.629756	0.0169123	1.86401	C18 H28 O3	292.203
Lumichrome	0.782199	0.00889592	1.93749	C12 H10 N4 O2	242.08
Coniferyl aldehyde	0.405321	0.0440527	1.49822	C10 H10 O3	178.063
N-Acetylmuramate	1.36454	0.045015	1.58083	C11 H19 N O8	293.111
5-Phosphoribosylamine	0.544967	0.0339663	1.62314	C5 H12 N O7 P	229.035
N-Glycolylneuraminic acid	1.19013	0.0386332	1.48958	C11 H19 N O10	325.1
2-Iodoanisole	2.19154	3.96041e-05	2.50845	C7 H7 I O	233.954
(R)-3-(4-Hydroxyphenyl)lactate	1.96373	0.0183665	1.97472	C9 H10 O4	182.058
3-Hydroxy-4-methylanthranilate	1.82555	0.00291294	2.04333	C8 H9 N O3	167.058
N5-(L-1-Carboxyethyl)-L-ornithine	1.5158	0.00700426	1.91672	C8 H16 N2 O4	204.111
(9Z_15Z)-(13S)-12_13-Epoxyoctadeca-9_11_15-trienoic acid	0.65061	0.0295544	1.91306	C18 H28 O3	292.203
(5Z_9E_14Z)-(8xi_11xi_12S)-8_11_12-Trihydroxyicosa-5_9_14-trienoate	2.73917	0.0125289	1.80543	C20 H34 O5	354.24
(5Z_9E_14Z)-(8xi_11xi_12S)-8_11_12-Trihydroxyicosa-5_9_14-trienoate	3.12412	0.0083376	2.04899	C20 H34 O5	354.24
Cortol	2.85827	0.0333072	1.7849	C21 H36 O5	368.256
3_4-Dihydroxyphenylethyleneglycol	0.735004	0.00817343	2.10863	C8 H10 O4	170.058
Hydrocinnamic acid	0.605829	0.0158424	1.85564	C9 H10 O2	150.068
5-Hydroxy-N-formylkynurenine	1.68385	0.0400923	1.54848	C11 H12 N2 O5	252.074
Methylimidazoleacetic acid	4.50573	0.025441	1.61247	C6 H8 N2 O2	140.058
Coumarin	2.05594	0.0328937	1.55323	C9 H6 O2	146.036
(S)-Abscisic acid	0.355007	0.000643832	2.31538	C15 H20 O4	264.135
Isoquinoline	3.4489	0.0387324	1.52869	C9 H7 N	129.058
quinbolone	1.14625	0.0240506	1.71844	C24 H32 O2	352.239
Neuraminic acid	2.77452	0.0318697	1.6275	C9 H17 N O8	267.096
Proclavaminic acid	2.56855	0.00526086	2.01269	C8 H14 N2 O4	202.095
Nitrobenzene	1.35926	0.00420359	2.2442	C6 H5 N O2	123.032
Carteolol	1.56418	0.0463281	1.50501	C16 H24 N2 O3	292.178
Nandrolone	1.75395	0.0350587	1.55771	C18 H26 O2	274.193
DibenzylSuccinate	2.14782	0.0450343	1.52551	C18 H18 O4	298.12
Suberic acid	4.30392	0.0412954	1.82654	C8 H14 O4	174.089
12-Hydroxydodecanoic acid	1.32593	0.0373427	1.77926	C12 H24 O3	216.172
Gynocardin	1.59109	0.000687026	2.43788	C12 H17 N O8	303.095
Antheraxanthin	1.3171	0.0293878	1.62552	C40 H56 O3	584.422
Osthol	0.267683	2.49911e-05	2.63444	C15 H16 O3	244.11
Deoxyelephantopin	2.85992	0.00142282	2.20685	C19 H20 O6	344.125
Helenalin	0.591569	0.014615	1.89127	C15 H18 O4	262.12
Stigmatellin Y	2.01896	0.0492926	1.59799	C29 H40 O6	484.281
2-Oxindole	0.389974	0.0301967	1.66583	C8 H7 N O	133.053
bisphenol A	0.746158	0.0223857	1.77975	C15 H16 O2	228.115
Lauramide	1.13077	0.0410349	1.6697	C12 H25 N O	199.193
butyrin	1.9455	0.00998622	2.08292	C15 H26 O6	302.172
CY9070000	1.5989	0.00462266	2.00409	C10 H14	134.109
Coumarone	0.380535	0.0422564	1.59957	C8 H6 O	118.041
gamma-Glutamyl-gamma-aminobutyraldehyde	2.4002	0.00922654	1.89582	C9 H16 N2 O4	216.111
3'-Hydroxyechinenone/3'-OH-Echinenone	1.30519	0.0493053	1.49144	C40 H54 O2	566.411
Dihydrophaseic acid	0.773085	0.0204776	1.82405	C15 H22 O5	282.146
12-oxo-10Z-dodecenoic acid	1.50157	0.0182507	1.75051	C12 H20 O3	212.141
Palmitoyl ethanolamide	0.52295	0.038021	1.61316	C18 H37 N O2	299.282
Sedanolide	1.48592	0.0197298	1.73336	C12 H18 O2	194.131
Etoglucid	0.672748	0.0103114	2.03668	C12 H22 O6	262.141
3,4-Dihydroxy-2-(7-hydroxy-9-methoxy-3,4-dioxo-1,2,3,4-tetrahydrocyclopenta[c]chromen-6-yl)butanal	0.562425	0.0040673	2.06018	C17 H16 O8	348.084
Methyl indole-3-acetate	2.86676	0.043509	1.48874	C11 H11 N O2	189.079
Gabapentin	7.51613	0.0492623	1.41528	C9 H17 N O2	171.126
mebutamate	2.1115	0.0161436	1.7696	C10 H20 N2 O4	232.142
Aceclidine	4.35376	0.0118938	1.74527	C9 H15 N O2	169.11
Phenprocoumon	2.32318	0.0169899	1.74465	C18 H16 O3	280.11
D-Pantothenic acid hemicalcium salt	1.70474	0.017517	1.80696	C9 H17 N O5	219.11
(2R)-2,3-Dihydroxypropyl 18-methylicosanoate	1.48212	0.0370534	1.80665	C24 H48 O4	400.354
5-(1,4-Dihydroxycyclohexyl)-1,2-dihydroxy-3-[(2E,4E,6E,8R,10R)-6,8,10-trimethyl-2,4,6-dodecatrienoyl]-4(1H)-pyridinone	0.555809	6.21659e-06	2.60346	C26 H37 N O6	459.26
Verrucarol	0.677508	0.0181554	1.78643	C15 H22 O4	266.151
pro-phe	2.79936	0.0082788	1.90484	C14 H18 N2 O3	262.132
Oleoyl ethanolamide	0.446457	0.0278664	1.68899	C20 H39 N O2	325.297
OD2400000	0.633533	0.0138902	1.89372	C5 H11 N O3	133.074
n-Amylbenzene	1.54826	0.00795011	1.89799	C11 H16	148.125
lys-leu	3.02858	0.017964	1.76461	C12 H25 N3 O3	259.189
Linoleamide	1.37276	0.0193859	1.69403	C18 H33 N O	279.255
Leucyl proline	2.81031	0.00545188	2.03245	C11 H20 N2 O3	228.147
Laurolactam	0.590534	0.0344387	1.67597	C12 H23 N O	197.178
L-Alanyl-L-proline	1.49726	0.00655379	1.92361	C8 H14 N2 O3	186.1
Indole-3-carbinol	2.55459	0.00820408	1.90722	C9 H9 N O	147.068
Hexyl 2-furoate	0.492222	0.00527492	2.06647	C11 H16 O3	196.11
Hexyl 2-furoate	0.510399	0.000804255	2.57906	C11 H16 O3	196.11
Hexanoylglycine	0.709121	0.0241168	1.98057	C8 H15 N O3	173.105
Heptanophenone	0.52072	0.028639	1.69892	C13 H18 O	190.135
Gly-Val	1.87695	0.00148289	2.20844	C7 H14 N2 O3	174.1
Ethyl palmitoleate	2.77368	0.00923337	1.92519	C18 H34 O2	282.255
EIcosanedioic acid	0.634597	0.00132031	2.48108	C20 H38 O4	342.276
D-Alanine methyl ester	0.578818	0.0445482	1.65567	C4 H9 N O2	103.063
cis-5-Tetradecenoylcarnitine	0.415471	0.0397319	1.78055	C21 H39 N O4	369.287
Cedefingol	0.225419	0.029402	1.68101	C20 H41 N O3	343.308
BMK glycidic acid	0.42361	0.0379157	1.63168	C10 H10 O3	178.063
Bis(4-ethylbenzylidene)sorbitol	1.15688	0.0361873	1.6213	C24 H30 O6	414.203
Avenalumic acid	1.61946	0.022259	1.7147	C11 H10 O3	190.063
Aspartyl-L-proline	1.23724	0.0324096	1.56193	C9 H14 N2 O5	230.09
9,12-Octadecadienal	2.76871	0.0104329	1.90698	C18 H32 O	264.245
8-Oxo-7,8-dihydroguanosine	1.82759	0.00484122	2.00758	C10 H13 N5 O6	299.088
8-Hydroxyhexadecanedioic acid	0.47184	0.00775264	2.01254	C16 H30 O5	302.209
6-Methylquinoline	0.550879	0.0383898	1.70071	C10 H9 N	143.073
6-Hydroxy-5-methyl-4,11-dioxoundecanoic acid	1.64169	0.0258293	1.93987	C12 H20 O5	244.131
5-Valerolactone	0.500919	0.0427086	1.69967	C5 H8 O2	100.052
5-Octyl-2-oxotetrahydro-3-furancarboxylic acid	0.629758	0.0478373	1.51825	C13 H22 O4	242.152
5-Methyltetradecanedioic acid	1.44436	0.0216511	2.00596	C15 H28 O4	272.198
4-[1-Cyclohexyl-2-(2-piperidinyl)ethyl]cyclohexanol	1.46266	0.0175572	1.74243	C19 H35 N O	293.271
3-Oxotetracosanoic acid	1.8226	0.00669467	2.19255	C24 H46 O3	382.344
3,5-di-tert-Butyl-4-hydroxybenzaldehyde	1.22606	0.0302206	1.66631	C15 H22 O2	234.162
3-(2-Hydroxy-4-methoxyphenyl)-8,8-dimethyl-2H,8H-pyrano[2,3-f]chromen-2-one	2.05492	0.0396298	1.54293	C21 H18 O5	350.115
3-(2,4,5-Trimethoxyphenyl)-7-chromanol	2.12191	0.0172451	1.82853	C18 H20 O5	316.13
2-Methylglutaric acid	2.44464	0.0189898	1.91279	C6 H10 O4	146.058
2-Isocapryloyl-3R-hydroxymethyl-gamma-butyrolactone	0.359946	0.0129758	1.99074	C13 H22 O4	242.151
2-Aminoethyl (2R)-3-[(1Z)-1-hexadecen-1-yloxy]-2-hydroxypropyl hydrogen phosphate	0.454132	0.00864278	2.07157	C21 H44 N O6 P	437.29
2-(2,5-Dihydroxy-4-methoxyphenyl)propanoic acid	0.665542	0.0472866	1.88285	C10 H12 O5	212.068
1-O-Arsonopentofuranose	2.18846	0.00463218	2.09949	C5 H11 As O8	273.966
18-acetoxy-1alpha-hydroxyvitamin D3	2.09045	0.00544893	1.85619	C29 H46 O4	458.338
1_2-Dihydrosantonin	0.354418	3.4391e-05	2.5565	C15 H20 O3	248.141
1-[5-(Methoxymethyl)-2-furyl]-9H-beta-carboline-3-carboxylic acid	5.16835	0.0083205	2.0202	C18 H14 N2 O4	322.095
1,5-Isoquinolinediol	1.95405	0.00623904	1.92589	C9 H7 N O2	161.047
1,5-Isoquinolinediol	2.05202	0.00474689	2.09323	C9 H7 N O2	161.047
1,3,7-Octanetriol	1.11948	0.00743017	2.00353	C8 H18 O3	162.125
[FAtrihydroxy(18:0)]9_10_13-trihydroxy-11-octadecenoic acid	0.528193	0.0221886	1.77118	C18 H34 O5	330.24
(3E)-4-(4-Hydroxy-2,6,6-trimethyl-1-cyclohexen-1-yl)-3-buten-2-one	0.495312	0.0284658	1.67765	C13 H20 O2	208.146
(3beta,4alpha,5alpha)-3-Hydroxyergosta-7,24(28)-diene-4-carbaldehyde	1.6529	0.00833468	1.86679	C29 H46 O2	426.349
(2Z)-4-Methyl-2-phenyl-2-pentenal	0.377301	0.0245731	1.65739	C12 H14 O	174.104
(2E,6E,8E,10E)-2,6,8,10-Dodeca tetraenoic acid	2.16931	0.0333225	1.58389	C12 H16 O2	192.115

## Sheet: Hindgut
Name	Ratio(D hindgut/T hindgut )	Pvalue(D hindgut/T hindgut)	VIP(D hindgut/T hindgut)	Formula	Molecular Weight
Uracil	1.69093	0.035633	1.50647	C4 H4 N2 O2	112.027
Thymine	1.58434	0.0329178	1.76432	C5 H6 N2 O2	126.043
Valine	0.681835	0.0393044	1.80129	C5 H11 N O2	117.079
Thymidine	2.09142	0.0228343	1.58748	C10 H14 N2 O5	242.09
Arachidonic acid	2.15507	0.0367472	1.44328	C20 H32 O2	304.24
2,4-Dihydroxybenzoic acid	1.66262	0.0020509	2.00709	C7 H6 O4	154.026
Hypoxanthine	1.72321	0.0495836	1.59522	C5 H4 N4 O	136.038
Cytosine	1.55355	0.0298993	1.74949	C4 H5 N3 O	111.043
Xanthine	2.64417	0.0465931	1.61048	C5 H4 N4 O2	152.033
2,3-Dimethoxy-5-methyl-6-(3-methyl-2-buten-1-yl)-1,4-benzenediol	2.06211	0.0312795	1.69369	C14 H20 O4	252.136
D-Aspartic acid	0.601128	0.023053	1.92118	C4 H7 N O4	133.037
Salicylic acid	1.38612	0.0223105	1.57341	C7 H6 O3	138.031
4-Pyridoxic acid	0.371703	0.0291554	1.57681	C8 H9 N O4	183.053
Pantothenic acid	2.20291	0.000439735	2.31373	C9 H17 N O5	219.11
Deoxycytidine	1.81375	0.00758451	2.05185	C9 H13 N3 O4	227.09
9S,13R-12-Oxophytodienoic acid	1.68784	0.00430931	2.08858	C18 H28 O3	292.203
Ferulic acid	2.37821	0.042517	1.54831	C10 H10 O4	194.058
Leupeptin	1.31127	0.0366879	1.78584	C20 H38 N6 O4	426.295
18-acetoxy-1alpha,25-dihydroxyvitamin D3	1.40289	0.00296486	2.09647	C29 H46 O5	474.332
Elaidic acid	1.53187	0.0397716	1.80107	C18 H34 O2	282.255
1-Methyladenine	2.0906	0.0183702	1.81588	C6 H7 N5	149.07
2'-Hydroxydaidzein	3.99753	0.0397874	1.55219	C15 H10 O5	270.052
(+/-)-Potassium citramalate monohydrate	0.726128	0.00610481	2.24074	C5 H8 O5	147.973
Pimelic acid	1.49535	0.0256366	1.39205	C7 H12 O4	160.073
4-Nitroacetophenone	1.60282	0.011142	1.91918	C8 H7 N O3	165.042
4-Coumaroylshikimate	0.751303	0.0224602	1.77757	C16 H16 O7	320.089
L-2-Hydroxyphytanate	1.86892	0.00931013	2.0284	C20 H40 O3	328.297
Dimethylbenzimidazole	0.501837	0.0257851	1.72452	C9 H10 N2	146.084
3-Hydroxy-4-methylanthranilate	1.6053	0.0293739	1.79426	C8 H9 N O3	167.058
1-palmitoylglycerol;MAG(16:0)	1.85486	2.13519e-05	2.82374	C19 H38 O4	330.276
N-palmitoylserinol	1.48601	0.00875155	1.91692	C19 H39 N O3	329.292
D-1-Aminopropan-2-olO-phosphate	0.486875	0.00747634	2.19084	C3 H10 N O4 P	155.035
1-Oleoylglycerophosphocholine	2.01235	0.0227912	1.74247	C26 H52 N O7 P	521.347
L-alpha-lysophosphatidylcholine	1.71458	0.0175942	1.88423	C22 H46 N O7 P	467.3
4-Methyl-5-(2-phosphoethyl)-thiazole	0.736131	0.013052	1.80378	C6 H10 N O4 P S	223.006
3-Amino-3-(4-hydroxyphenyl)propanoate	3.04587	0.0464375	1.53144	C9 H11 N O3	181.074
3beta-Hydroxy-4beta-methyl-5alpha-cholest-7-ene-4alpha-carboxylate	0.642319	0.0482225	1.68365	C29 H48 O3	444.359
2'-Deoxyinosine	2.0967	0.0451446	1.32901	C10 H12 N4 O4	252.085
3_4-Dihydroxyphenylethyleneglycol	0.586372	0.0417768	1.4104	C8 H10 O4	170.058
Stercobilin	3.25645	0.0383689	1.59166	C33 H46 N4 O6	594.34
3-Methyldioxyindole	2.44935	0.0477205	1.56999	C9 H9 N O2	163.063
Piceatannol	0.772815	0.049907	1.59213	C14 H12 O4	244.073
Docosahexaenoic acid	2.14813	0.0266464	1.73653	C22 H32 O2	328.24
Hydroxymethylphosphonate	2.13467	0.00938001	1.95721	C H5 O4 P	111.992
Neuraminicacid	2.57512	0.0239721	1.77916	C9 H17 N O8	267.096
Phenylmethanesulfonylfluoride	2.61315	0.0218041	1.80379	C7 H7 F O2 S	174.015
Carteolol	3.30199	0.0334908	1.62053	C16 H24 N2 O3	292.178
Isoprenaline	3.77905	0.0459997	1.54267	C11 H17 N O3	211.12
AF4878000	4.02155	0.0373157	1.60615	C11 H12 O3	192.079
Nandrolone	1.82034	0.0208389	1.7899	C18 H26 O2	274.193
DibenzylSuccinate	0.479113	0.0400931	1.76802	C18 H18 O4	298.12
1-(2,4,6-Trihydroxyphenyl)-3-(3,4,5-trimethoxyphenyl)-1-propanone	0.61247	0.0136439	1.83102	C18 H20 O7	348.12
D-glycero-D-manno-Heptose1-phosphate	3.16122	0.0406502	1.6439	C7 H15 O10 P	290.041
8-Hydroxyhexadecanedioic acid	0.5734	0.0277722	1.78465	C16 H30 O5	302.209
α-Eleostearic acid	2.05632	0.0364308	1.62243	C18 H30 O2	278.224
convicine	2.58385	0.0405783	1.31976	C10 H15 N3 O8	305.085
Antheraxanthin	1.50223	0.000578689	2.36224	C40 H56 O3	584.422
Echinenone/(Myxoxanthin)	1.38098	0.0130056	1.84873	C40 H54 O	550.416
Ursolic acid	4.34114	0.0283353	1.89403	C30 H48 O3	456.359
Methysticin	0.701314	0.0192363	1.79786	C15 H14 O5	274.084
Norlichexanthone	2.45932	0.00257073	2.44454	C14 H10 O5	258.052
(-)-Usnic acid	0.635264	0.0462596	1.63706	C18 H16 O7	344.089
[PK]Chrysophanol	4.41396	0.00894112	1.99397	C15 H10 O4	254.057
3-Methyl-2-butenyl caffeate	1.81173	0.0182657	1.75856	C14 H16 O4	248.105
3'-hydroxyacetophenone;3-ACETYLPHENOL	0.438082	0.0487641	1.6196	C8 H8 O2	136.052
Jervine	1.11688	0.00279459	2.16949	C27 H39 N O3	425.292
2B73S48786	0.639201	0.0172676	1.94004	C27 H45 N O2	415.344
Ecgonine	2.3779	0.039499	2.01698	C9 H15 N O3	185.105
DEET	2.99675	0.0414843	1.60901	C12 H17 N O	191.131
Dichloroacetic acid	16.9509	0.0397149	1.76551	C2 H2 Cl2 O2	127.943
ArachidoylEthanolamide	1.0742	0.0227516	1.95829	C22 H45 N O2	355.344
(-)-Epiafzelechin	0.702034	0.0434902	1.40901	C15 H14 O5	274.084
Saccharin	1.79554	0.0361905	1.88903	C7 H5 N O3 S	182.999
[FA(20:4)]17R_18S-epoxy-5Z_8Z_11Z_14Z-eicosatetraenoicacid	1.66706	0.0372481	1.72788	C20 H30 O3	318.219
N,N-Dimethylsphingosine	1.52754	0.0395226	1.56145	C20 H41 N O2	327.313
(+/-)12(13)-DiHOME	1.42106	0.0463268	1.60567	C18 H34 O4	314.245
6-(1,2,3,4-Tetrahydro-6-methoxy-2-naphthyl)-2(1H)-pyridone	0.553855	0.0406263	1.76701	C16 H17 N O2	255.126
3-BHA	1.48102	0.000843454	2.29966	C11 H16 O2	180.115
6-(2-Amino-2-carboxyethyl)-7_8-dioxo-7_8-dihydroquinoline-2_4-dicarboxylate	0.609241	0.015316	1.85626	C14 H14 N2 O8	338.076
3'-Hydroxyechinenone/3'-OH-Echinenone	1.517	0.000631012	2.34683	C40 H54 O2	566.411
7-Hydroxy-2'_4'_5'-trimethoxyisoflavone	0.746058	0.0226761	1.74523	C18 H16 O6	328.094
(-)-Sophorol	2.82204	0.0380158	2.01419	C16 H12 O6	300.063
3_6-Nonadienal	1.54897	0.00388674	2.1362	C9 H14 O	138.104
Glycerophospho-N-palmitoyl ethanolamine	1.84959	0.0347015	1.6587	C21 H44 N O7 P	453.284
2-Oxononadecanoic acid	1.65536	0.0338757	1.66503	C19 H36 O3	312.265
(-)threo-iso(homo)3citrate	0.292013	0.015235	1.65264	C9 H14 O7	234.073
L-isoglutamine	2.17681	0.0457637	1.62667	C6 H12 N2 O2	144.09
2,4-Quinolinediol	2.2494	0.00808578	1.99657	C9 H7 N O2	161.048
chavicol	0.813241	0.0214147	1.78831	C9 H10 O	134.073
tilisolol	4.46027	0.00386435	2.1074	C17 H24 N2 O3	304.178
pyropheophorbidea	1.71656	0.0109503	1.89038	C33 H36 N4 O3	536.277
demethylsuberosin	0.751299	0.0197336	1.80349	C14 H14 O3	230.094
7-Dechlorogriseofulvin	0.645248	0.0484593	1.76588	C17 H18 O6	318.11
3,4-Dihydroxy-2-(7-hydroxy-9-methoxy-3,4-dioxo-1,2,3,4-tetrahydrocyclopenta[c]chromen-6-yl)butanal	0.524014	0.0101593	1.92222	C17 H16 O8	348.084
n-Hexanamide	1.23757	0.00930464	2.06372	C6 H13 N O	115.099
1-stearoyl-sn-glycero-3-phosphoethanolamine	1.82282	0.0358809	1.68601	C23 H48 N O7 P	481.316
Isophthalic acid	1.43589	0.0114075	1.6288	C8 H6 O4	166.026
trimethadione	0.560218	0.00502768	2.18691	C6 H9 N O3	143.058
Misoprostol	1.12896	0.000148142	2.49609	C22 H38 O5	382.271
propyphenazone	1.64848	0.047185	1.57699	C14 H18 N2 O	230.141
(9Z)-9-Cycloheptadecen-1-ol	1.17788	0.0461857	1.58892	C17 H32 O	252.245
Butabarbital	0.74054	0.0358919	1.81582	C10 H16 N2 O3	212.116
8-Hydroxyquinoline	2.81484	0.0140393	1.89531	C9 H7 N O	145.053
Tricetamide	3.26967	0.014869	1.82048	C16 H24 N2 O5	324.168
D-Pantothenic acid hemicalcium salt	1.90308	0.000351766	2.44676	C9 H17 N O5	219.11
Medroxyprogesterone	0.660306	0.0205921	1.97551	C22 H32 O3	344.234
4-[1-Cyclohexyl-2-(2-piperidinyl)ethyl]cyclohexanol	1.45101	0.0355521	1.64322	C19 H35 N O	293.271
Roxatidine	7.5137	0.0101387	1.96039	C17 H26 N2 O3	306.194
Laninamivir	2.89463	0.0367396	1.59434	C13 H22 N4 O7	346.15
Elacytarabine	2.29682	0.0281054	1.67234	C27 H45 N3 O6	507.331
Surotomycin	2.20174	0.00549236	2.01061	C77 H101 N17 O26	1679.71
(2R)-3-[(13Z)-13-Docosenoyloxy]-2-[(15Z)-15-tetracosenoyloxy]propyl 2-(trimethylammonio)ethyl phosphate	0.15218	0.0276922	1.83803	C54 H104 N O8 P	925.746
(2E)-3,7-Dimethyl-2,6-octadien-1-yl beta-D-glucopyranoside	0.165752	0.0472129	1.53884	C16 H28 O6	316.188
5-(1,4-Dihydroxycyclohexyl)-1,2-dihydroxy-3-[(2E,4E,6E,8R,10R)-6,8,10-trimethyl-2,4,6-dodecatrienoyl]-4(1H)-pyridinone	0.458898	1.18769e-05	2.64822	C26 H37 N O6	459.26
3-Hydroxysebacic acid	0.462609	0.0406073	1.71296	C10 H18 O5	218.115
NECA	0.590681	0.0390542	1.74266	C12 H16 N6 O4	308.123
7,8-Dimethoxy-2-phenyl-2,3-dihydro-4H-chromen-4-one	0.600945	0.0175768	1.85057	C17 H16 O4	284.105
2-(4-Hydroxyphenyl)-7,8-dimethoxy-4-chromanol	0.612005	0.0289308	1.73055	C17 H18 O5	302.115
(1R)-1,5-Anhydro-6-deoxy-1-(1-hydroxy-10,12-dimethoxy-6-oxo-8-vinyl-6H-dibenzo[c,h]chromen-4-yl)-D-galactitol	0.646429	0.0412083	1.62879	C27 H26 O9	494.156
(3R,4R)-4-(3,4-Dihydroxybenzyl)-3-(3-hydroxybenzyl)dihydro-2(3H)-furanone	0.663938	0.0429454	1.48909	C18 H18 O5	314.115
2_4_6/3_5-Pentahydroxycyclohexanone	0.739117	0.0476645	1.41116	C6 H10 O6	178.047
1,4-Dimethylimidazole	0.817464	0.0444736	1.55878	C5 H8 N2	96.0685
2-(3,4-Dimethoxyphenyl)-5,7,8-trihydroxy-3-methoxy-2,3-dihydro-4H-chromen-4-one	0.661418	0.0505822	1.52875	C18 H18 O8	362.1
2,5-di-tert-Butylhydroquinone	1.07181	0.000738454	2.19939	C14 H22 O2	222.162
(4R,9beta,16alpha)-2,16,20,24,25-Pentahydroxy-9,10,14-trimethyl-4,9-cyclo-9,10-secocholesta-2,5-diene-1,11,22-trione	1.10254	0.0251642	1.75681	C30 H44 O8	532.302
N-Stearoyl taurine	1.28613	0.0392628	1.75882	C20 H41 N O4 S	408.302
(1S,2R,5S)-2-Isopropyl-5-methylcyclohexyl 3-oxobutanoate	1.37467	0.0487948	1.66594	C14 H24 O3	240.172
1,3-Dihydroxy-2-propanyl (13Z)-13-docosenoate	1.48527	0.0297004	1.85709	C25 H48 O4	412.354
16,16-Dimethylprostaglandin A1	1.51955	0.00325941	2.11973	C22 H36 O4	364.26
3-Methyl-5-(5,5,8a-trimethyl-2-methylene-7-oxodecahydro-1-naphthalenyl)pentyl acetate	1.52463	0.0483175	1.53261	C22 H36 O3	348.265
O-(4,8-dimethylnonanoyl)carnitine	1.62411	0.00549144	2.13166	C18 H35 N O4	329.256
(2R)-3-{[(2-Aminoethoxy)(hydroxy)phosphoryl]oxy}-2-hydroxypropyl pentadecanoate	1.63233	0.0111959	1.96618	C20 H42 N O7 P	439.269
(12S)-12-Hydroxy-16-heptadecynoic acid	1.65345	0.0487906	1.64206	C17 H30 O3	282.219
2,4,6-trihydroxy-5-(1-(5-(1-hydroxy-isopropyl)-2,8-dimethylbicyclo(5.3.0)dec-6-en-8-yl)-3-methylbutyl)benzene-1,3-dicarbaldehyde	1.68482	0.00732041	1.9848	C28 H40 O6	472.281
(2Z)-4-Methyl-2-phenyl-2-pentenal	1.90434	0.0198738	1.80532	C12 H14 O	174.104
3-Oxotetracosanoic acid	1.91341	0.00925724	1.9673	C24 H46 O3	382.344
(2R)-2,3-Dihydroxypropyl 18-methylicosanoate	1.96405	0.0146496	1.86683	C24 H48 O4	400.354
1-[(3-Carboxypropyl)amino]-1-deoxy-beta-D-fructofuranose	2.02748	0.0132918	1.92434	C10 H19 N O7	265.117
cis-5-Tetradecenoylcarnitine	2.04566	0.0304532	1.76368	C21 H39 N O4	369.287
1-(3-Furyl)-1,4-pentanediol	2.17099	0.0415522	1.60505	C9 H14 O3	170.094
4-Acetamidobenzaldehyde	2.29601	0.0103817	1.94601	C9 H9 N O2	163.063
Hexanoylglycine	2.36022	0.0447837	1.7487	C8 H15 N O3	173.105
Indole-3-carbinol	2.5238	0.0404369	1.67184	C9 H9 N O	147.068
1-methyl-1,2,3,4-tetrahydro-beta-carboline-3-carboxylic acid	2.5426	0.0336283	1.74464	C13 H14 N2 O2	230.105
9-(3-Methyl-5-pentyl-2-furyl)nonanoic acid	2.57023	0.0144538	1.83607	C19 H32 O3	308.234
1,5-Isoquinolinediol	2.92001	0.00307109	2.1398	C9 H7 N O2	161.047
1-heptadecanoyl-sn-glycero-3-phosphocholine	2.96996	0.00682357	2.01647	C25 H52 N O7 P	509.347
(2Z)-3-Phenyl-1-(1-pyrrolidinyl)-2-propen-1-one	3.26691	0.0131823	1.92804	C13 H15 N O	201.115
Hydroxycarteolol	3.51145	0.0225462	2.16311	C16 H24 N2 O4	308.173
(9alpha,11alpha,15S)-9,11,15-Trihydroxyprostan-1-oic acid	3.8481	0.000527537	2.42287	C20 H38 O5	358.271
